# Supplementary material for: Quantifying the level of nanoparticle uptake in mammalian cells using flow cytometry
Source: Royal Society of Chemistry journal article supplement (doi:10.1039/d0nr01627f), 2020-01-01
Supplement: d0nr01627f1.pdf [file d0nr01627f1.pdf]

## Supplemental Information

### Quantifying the level of nanoparticle uptake in mammalian cells using flow cytometry

HeyRim Shin<sup>1</sup>, Minjeong kwak<sup>2</sup>, Tae Geol Lee<sup>2</sup>, and Ji Youn Lee<sup>1\*</sup>

<sup>1</sup> Center for Bioanalysis, Division of Chemical and Medical Metrology, Korea Research Institute of Standards and Science, 267 Gajeong-ro, Yuseong-gu, Daejeon 34113, Republic of Korea

<sup>2</sup> Center for Nano-Bio Measurement, Division of Industrial Metrology, Korea Research Institute of Standards and Science, 267 Gajeong-ro, Yuseong-gu, Daejeon 34113, Republic of Korea

\*Corresponding author (JYL)

Phone: +82-42-868-5363

Fax: +82-42-868-5801

E-mail: [jylee@kriss.re.kr](mailto:jylee@kriss.re.kr)

*Keywords:* Nanoparticle uptake, silica nanoparticle, fluorescence-labeled nanoparticle, flow cytometry, semi-quantification, MESF

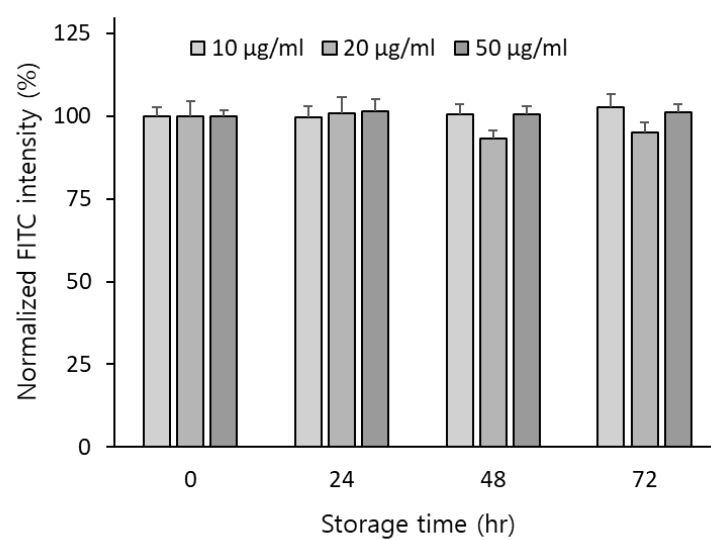

**Supplemental Figure 1.** Stability of FITC molecules in 20 nm SiO<sub>2</sub> nanoparticles during 72 hr.

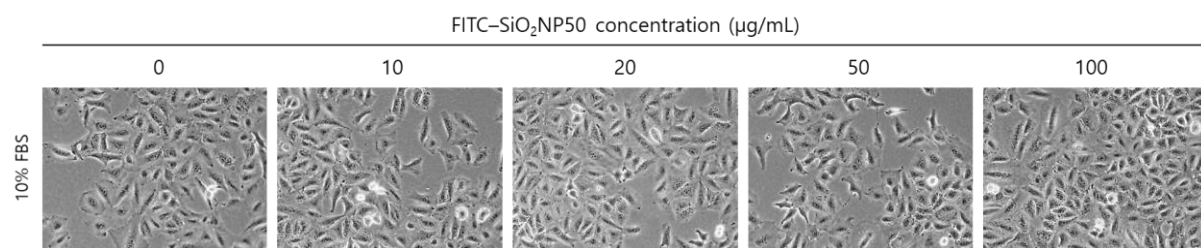

**Supplemental Figure 2.** Effect of the presence of FITC-SiO<sub>2</sub>NP50 treatment on cellular morphology and adhesion.

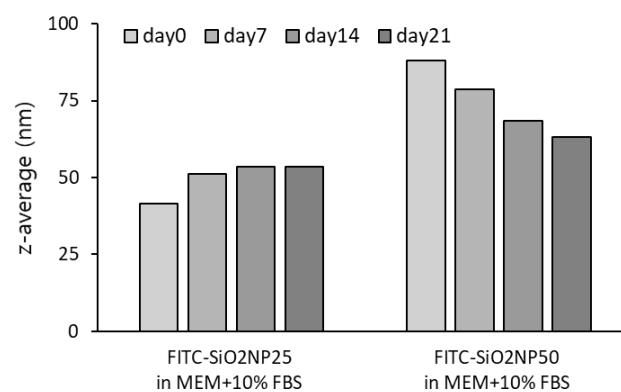

**Supplemental Figure 3.** Change in z-average size of FITC-SiO<sub>2</sub> nanoparticles in serum-containing media.

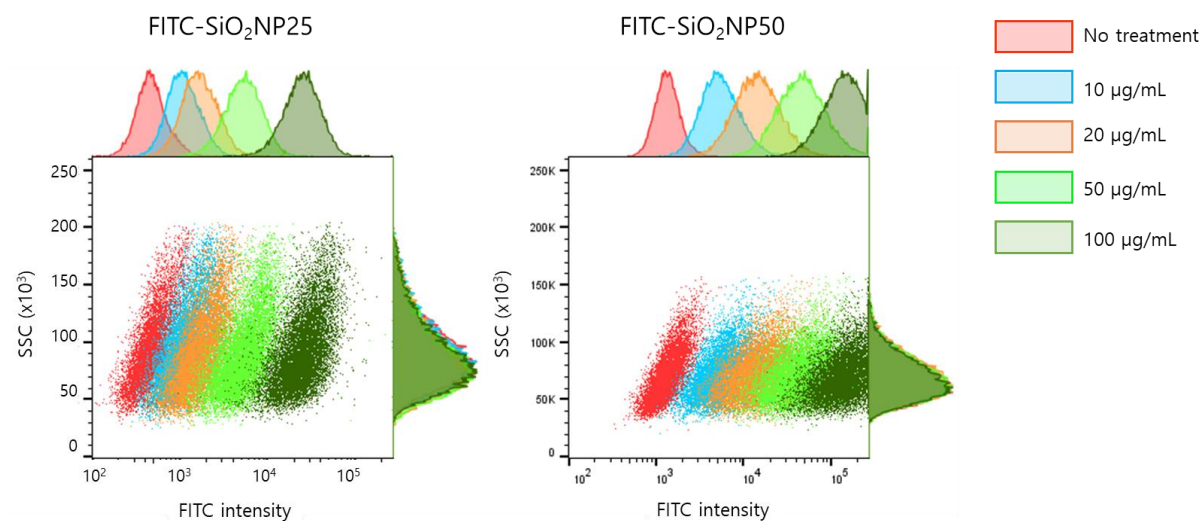

**Supplemental Figure 4.** Effect of nanoparticle treatment on the side scatter of A549 cells.

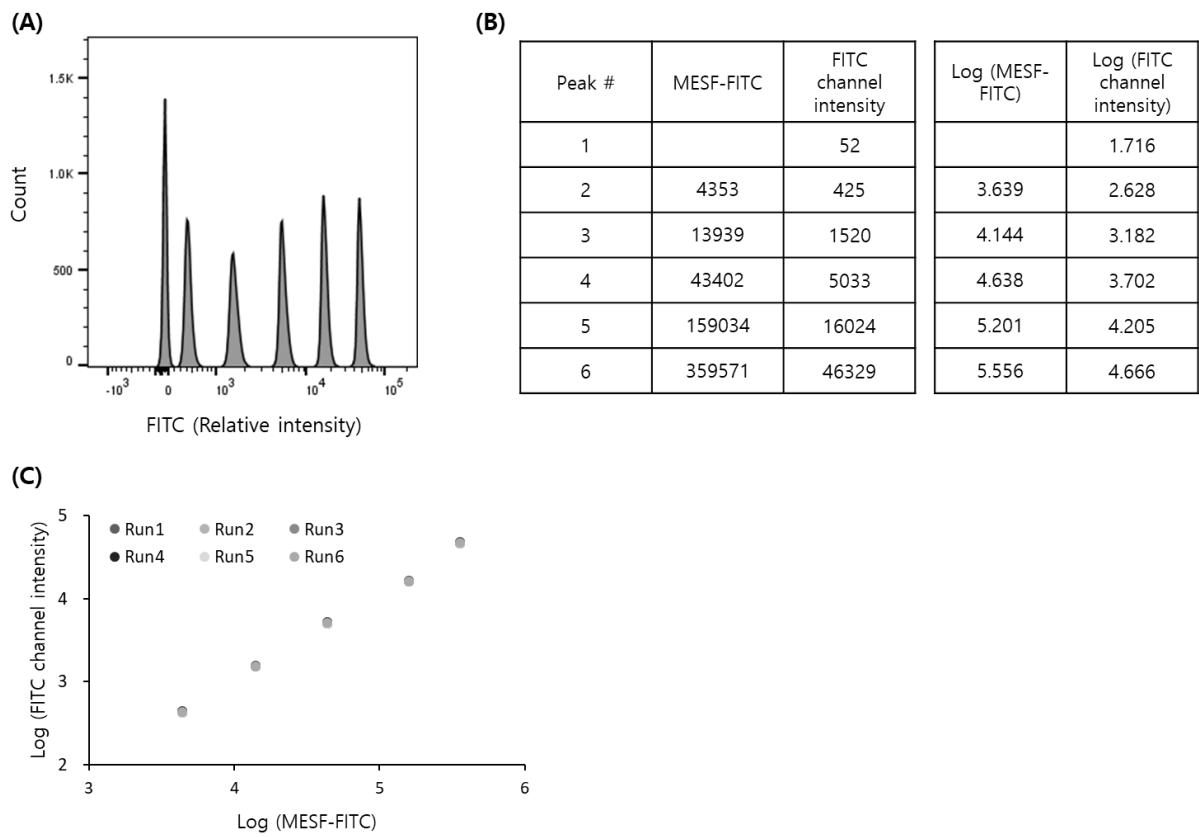

**Supplemental Figure 5.** Calibration of fluorescence intensity to MESF-FITC using Rainbow Calibration Beads. (A) A typical histogram and (B) corresponding MESF-FITC values of 6-peak Rainbow Beads. (C) Linear correlation between MESF-FITC log values and FITC intensity log values showing minimal deviation between runs.

| Tissue           | Cell lines         | Disease        | Beas-2B                                                                           | HCC827                                                                             | H1975                                                                               |
|------------------|--------------------|----------------|-----------------------------------------------------------------------------------|------------------------------------------------------------------------------------|-------------------------------------------------------------------------------------|
| Lung             | Beas-2B            | Normal         | 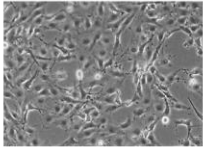 |  |  |
|                  | A549               | Carcinoma      |                                                                                   |                                                                                    |                                                                                     |
|                  | HCC827             | Adenocarcinoma |                                                                                   |                                                                                    |                                                                                     |
|                  | H1975              | Adenocarcinoma |                                                                                   |                                                                                    |                                                                                     |
| Skin             | HaCaT              | Normal         |  |  |  |
|                  | MNT1               | Melanoma       |                                                                                   |                                                                                    |                                                                                     |
|                  | Hs294T             | Melanoma       |                                                                                   |                                                                                    |                                                                                     |
| Colon            | Caco2              | Adenocarcinoma |  |  |  |
| Peripheral blood | THP-1<br>THP-1, M0 | Acute leukemia |                                                                                   |                                                                                    |                                                                                     |

**Supplemental Figure 6.** List of tested cell lines and their morphologies.

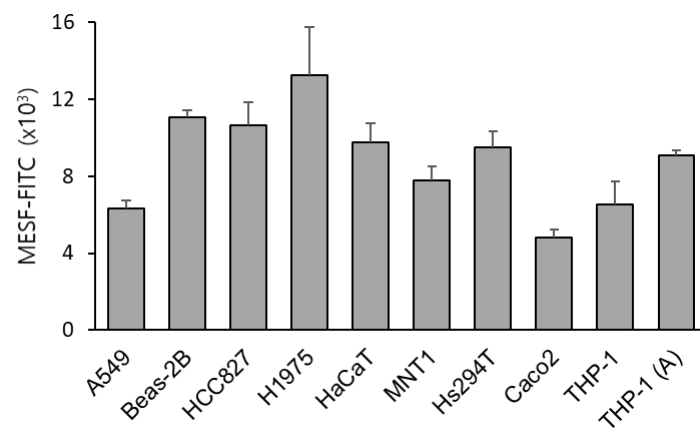

**Supplemental Figure 7.** MESF-FITC baseline by cell type.



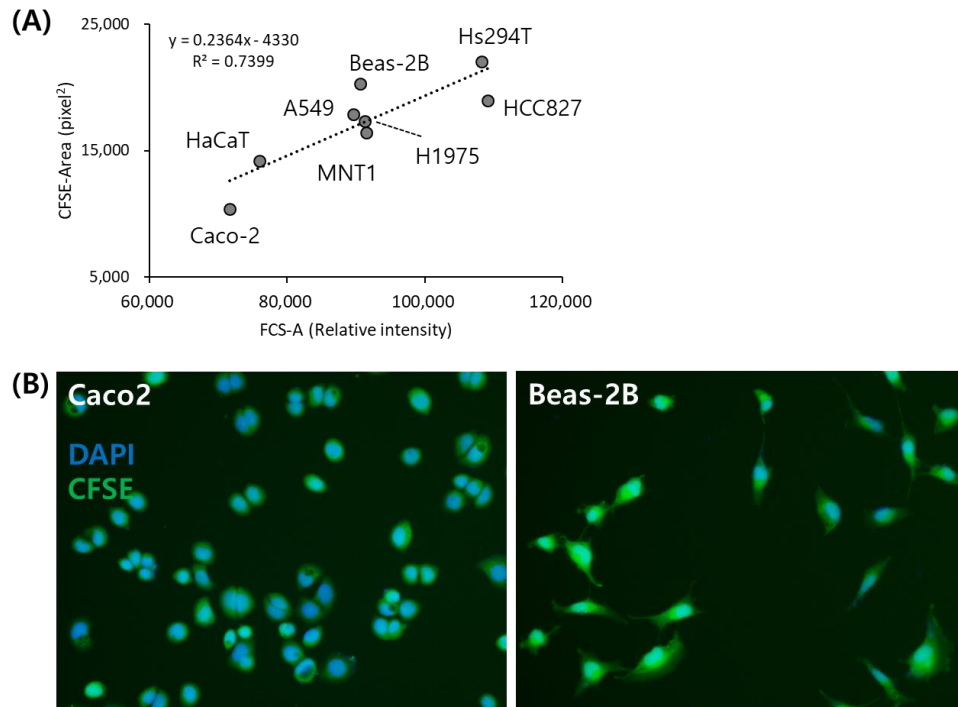

**Supplemental Figure 8.** (A) Correlation of FSC-A obtained via flow cytometer and CFSE-area obtained via image analysis. (B) Representative images of two different cell morphologies: round and convex Caco2 cells (left), and flat and stretched Beas-2B cells (right).

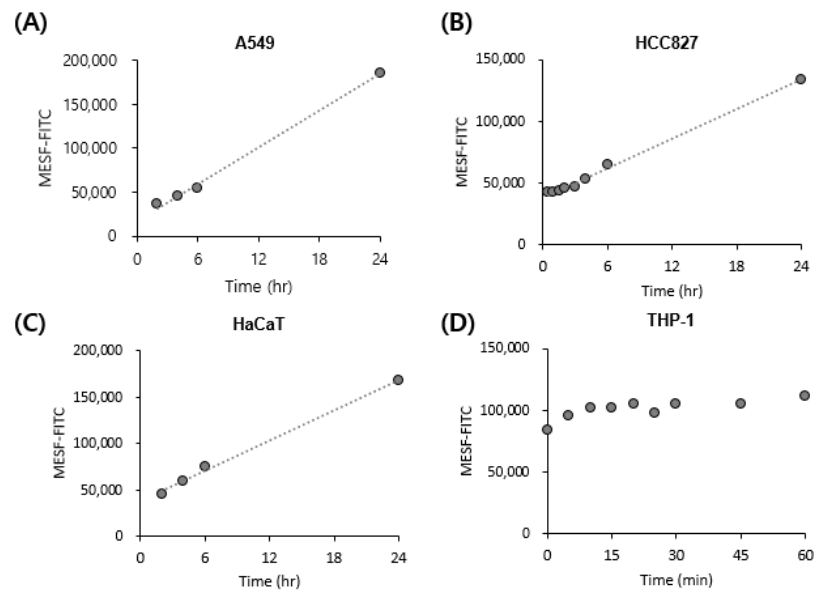

**Supplemental Figure 9.** Nanoparticle uptake dynamics of (A) A549 cells, (B) HCC827 cells, (C) HaCaT cells, and (D) THP-1 cells.
